# Supplementary material for: Theoretical definition of nurse–conscious mechanically ventilated patient communication: a scoping review with qualitative content analysis
Source: PubMed Central journal article supplement — Acute Crit Care. 2023 Feb 27;38(1):8–20. doi: 10.4266/acc.2022.01039 (PMC10030244; doi:10.4266/acc.2022.01039), 2023-02-27
Supplement: acc-2022-01039-Supplementary-Table-2.pdf [file acc-2022-01039-Supplementary-Table-2.pdf]

**Supplementary Table 2.** The search strategy of the study

| Electronic database | Syntax                                                                                                                                                                                                                                                                                                                                                                                                    | Limit                                                                                                                                               | Output number |
|---------------------|-----------------------------------------------------------------------------------------------------------------------------------------------------------------------------------------------------------------------------------------------------------------------------------------------------------------------------------------------------------------------------------------------------------|-----------------------------------------------------------------------------------------------------------------------------------------------------|---------------|
| PubMed              | (((((nurses) OR nursing)) AND (((Mechanically Ventilated Patients) OR Intubated patients) OR Mechanical Ventilation)) AND (((Communication) OR Interaction) OR Relationships) OR Nurse-Patient Communication) OR Nurse-Patient Relations)) AND ((Intensive Care Units) OR Critical care))                                                                                                                 | Publication date<br>Start day: Jan 1, 2000<br>End date: Jun 1, 2021                                                                                 | 680           |
| Cochrane Library    | (((((nurses:ti,ab,kw OR nursing:ti,ab,kw) AND ("Mechanically Ventilated Patients":ti,ab,kw OR "Intubated patients":ti,ab,kw OR "Mechanical Ventilation":ti,ab,kw)) AND (((Communication:ti,ab,kw OR Interaction:ti,ab,kw) OR Relationships:ti,ab,kw) OR "Nurse-Patient Communication":ti,ab,kw) OR "Nurse-Patient Relations":ti,ab,kw) AND ("Intensive Care Units":ti,ab,kw OR "Critical care":ti,ab,kw)) | Publication date<br>Start day: Jan 1, 2000<br>End date: Jun 1, 2021<br>+ search word variations                                                     | 54            |
| Web of Science      | ((TS=(nurse) OR TS=(nursing)) AND (TS=(Mechanically Ventilated Patients) OR TS=(Intubated patients) OR TS=(Mechanical Ventilation)) AND (TS=(Communication) OR TS=(Interaction) OR TS=(Relationships) OR TS=(Nurse-Patient Communication) OR TS=(Nurse-Patient Relations)) AND (TS=(Intensive Care Units) OR TS=(Critical care)))                                                                         | Publication date: 2000–2021                                                                                                                         | 292           |
| Scopus              | ( TITLE-ABS-KEY ( nurse OR nursing ) AND TITLE-ABS-KEY ("Mechanically Ventilated Patients" OR "Intubated patients" OR "Mechanical Ventilation") AND TITLE-ABS-KEY ( communication OR interaction OR relationships OR "Nurse-Patient Communication" OR "Nurse-Patient Relations") AND TITLE-ABS-KEY ("Intensive Care Units" OR "Critical care") )                                                          | Publication date: 2000–2021                                                                                                                         | 305           |
| CINAHL              | TX ( nurse or nursing ) AND TX ( Mechanically Ventilated Patients OR Intubated patients OR Mechanical Ventilation ) AND TX ( Communication OR Interaction OR Relationships OR Nurse-Patient Communication OR Nurse-Patient Relations ) AND TX ( intensive care unit or critical care )                                                                                                                    | Limiters – Full-Text; Abstract Available; Published Date: Jan 1, 2000–Dec 31, 2021 Expanders - Apply related words<br>Search modes - Boolean/Phrase | 375           |
| Embase              | (nurse:ti,ab,kw OR nursing:ti,ab,kw) AND ('mechanically ventilated patients':ti,ab,kw OR 'intubated patients':ti,ab,kw OR 'mechanical ventilation':ti,ab,kw) AND ('interpersonal communication':ti,ab,kw OR interaction:ti,ab,kw OR relationships:ti,ab,kw OR 'nurse-patient communication':ti,ab,kw OR 'nurse patient relationship':ti,ab,kw) AND [2000-2021]/py                                         | Publication date: 2000–2021                                                                                                                         | 53            |
